# Supplementary material for: Investigation of the roles of TGFβ1, CUG2, TGFBI genes, and thiol-disulfide balance on prostate cancer and metastasis
Source: publisher site journal article supplement (doi:10.1515/tjb-2022-0259), 2023-06-01
Supplement: Supplementary file 1 [file j_tjb-2022-0259_suppl_001.docx]

**Supplementary table 1.** Sequences of primers used in RT-qPCR assays.

| Gene | Specific Primer Sequence | Product length |
| --- | --- | --- |
| β-Actin (HouseKeeping) | F: CATGTACGTTGCTATCCAGGC | 250 bp |
| R: CTCCTTAATGTCACGCACGAT |
| TGF β1 | F: CAATTCCTGGCGATACCTCAG | 86 bp |
| R: GCACAACTCCGGTGACATCAA |
| CUG2 | F: AAGCCTCAACTTCGTCTGGAG | 148 bp |
| R: CACAAGCGTTTGTCCTGGACT |
| TGFBI | F: GTGCGGCTAAAGTCTCTCCA | 121 bp |
| R: CATGGACCACGCATTTTGTG |

TGF β1: transforming growth factor-beta 1, CUG2: cancer upregulated gene, TGFBI: transforming growth factor beta induced
